# Supplementary material
Source: publisher figshare collection journal article supplement (https://acs.figshare.com/ndownloader/files/4190830)
Supplement: Supplementary file 1 [file 4190830]

## SUPPORTING INFORMATION

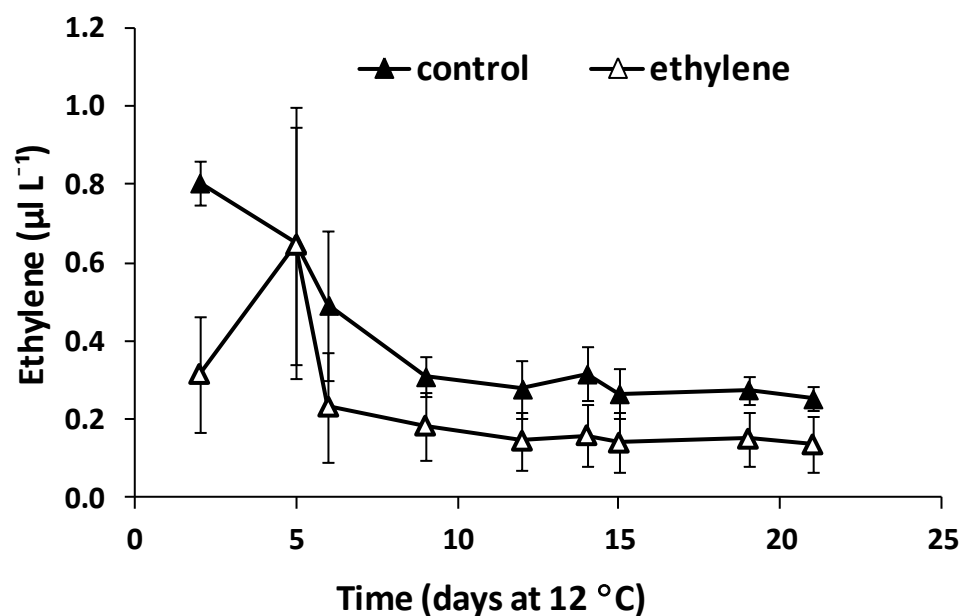

**Figure S1.** Ethylene measurements during storage at  $12\text{ }^{\circ}\text{C}$  of RS winter fruits (RSw) treated and untreated with ethylene. Treated fruits were exposed to 100ppm ethylene for 42h at  $20\text{ }^{\circ}\text{C}$ . Values are means  $\pm$  SE of headspace measurements in 3 boxes at each time point. Each box contained 6 fruits wrapped in PP film (M&M).

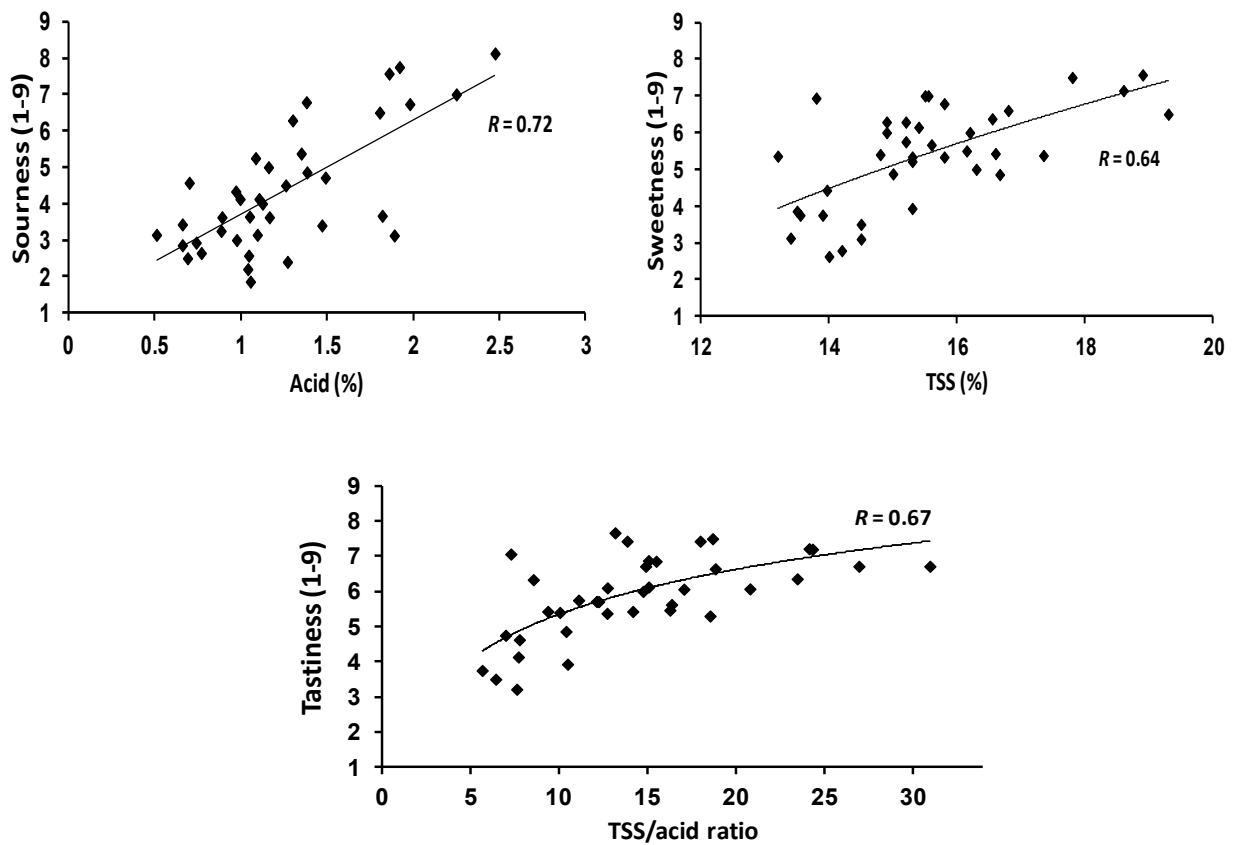

**Figure S2.** Correlations results of taste indices vs. chemical measurements, performed between sourness and acid content, sweetness and TSS content, and tastiness and TSS/acid ratios of six passion fruit lines. Each point represents the average taste index of 12 panelists vs. the average chemical measurement of 3-5 samples of the same line.
